# Supplementary material for: Tanshinone IIA mediates SMAD7-YAP interaction to inhibit liver cancer growth by inactivating the transforming growth factor beta signaling pathway
Source: Aging (Albany NY). 2019 Nov 11;11(21):9719–37. doi: 10.18632/aging.102420 (PMC6874425; doi:10.18632/aging.102420)
Supplement: Supplementary Figures [file aging-11-102420-s001.pdf]

## SUPPLEMENTARY FIGURES

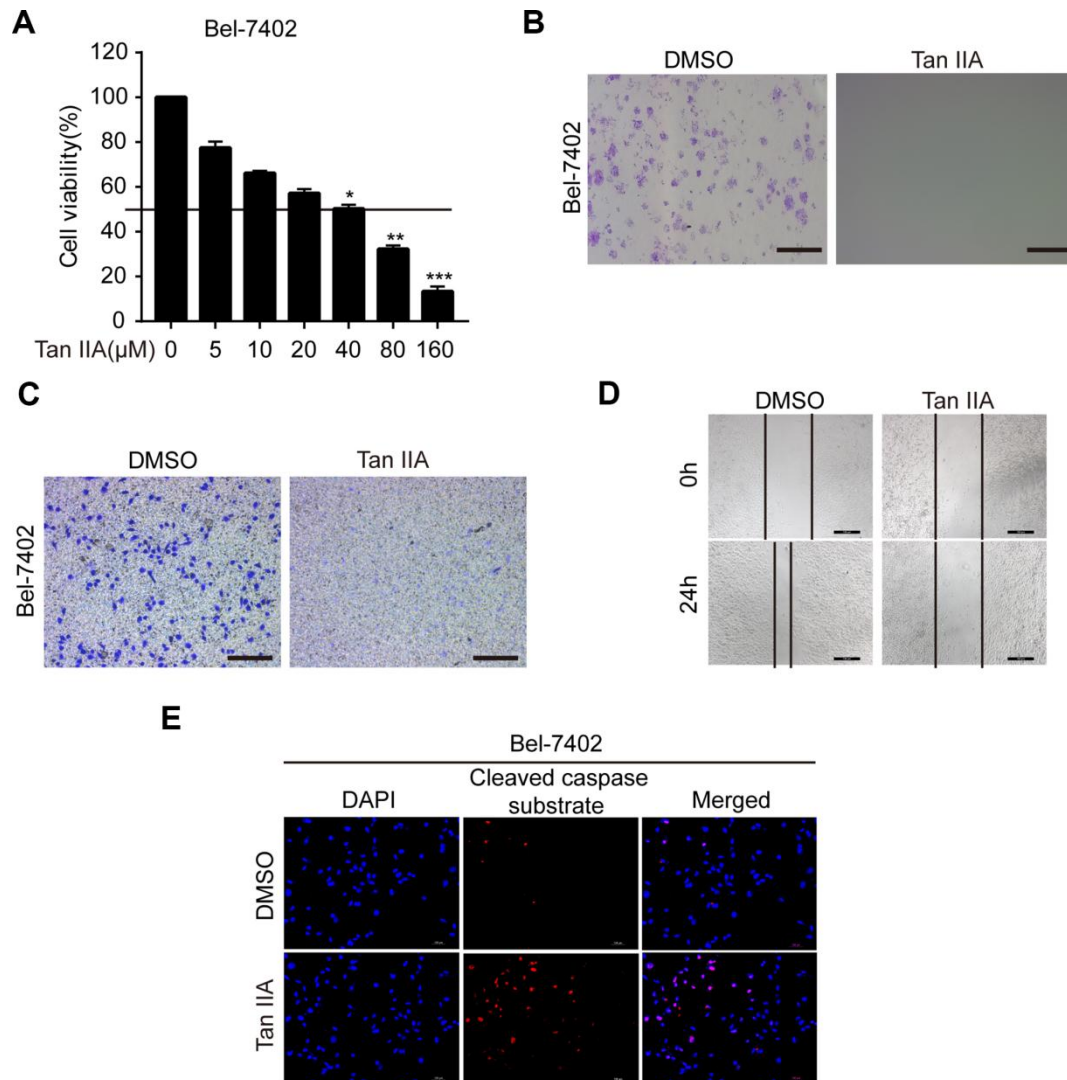

**Supplementary Figure 1.** (A) Cell viability of Bel-7402 cells treated with DMSO or dose dependent Tan IIA was determined by CCK-8 cytotoxicity test. \* $p < 0.05$ , \*\* $p < 0.01$ , \*\*\* $p < 0.001$  vs DMSO. (B) Colony formation assay was to determine cell clonogenic ability in Bel-7402 cells with DMSO or 40  $\mu\text{M}$  Tan IIA. Scale bars: 50  $\mu\text{m}$ . (C) Cell invasion ability was measured by Transwell invasion assay in Bel-7402 cell lines treated with DMSO or 40  $\mu\text{M}$  Tan IIA. Scale bars: 50  $\mu\text{m}$ . (D) Cell wound healing assay was performed to measure cell migration ability in Bel-7402 cells treated with DMSO or 40  $\mu\text{M}$  Tan IIA. The representative images were taken in different time points. Scale bars: 100  $\mu\text{m}$ . (E) Tan IIA induced apoptosis marker cleaved caspase substrate expression measured by immunofluorescence assay in Bel-7402 cells. Scale bars: 100  $\mu\text{m}$ .

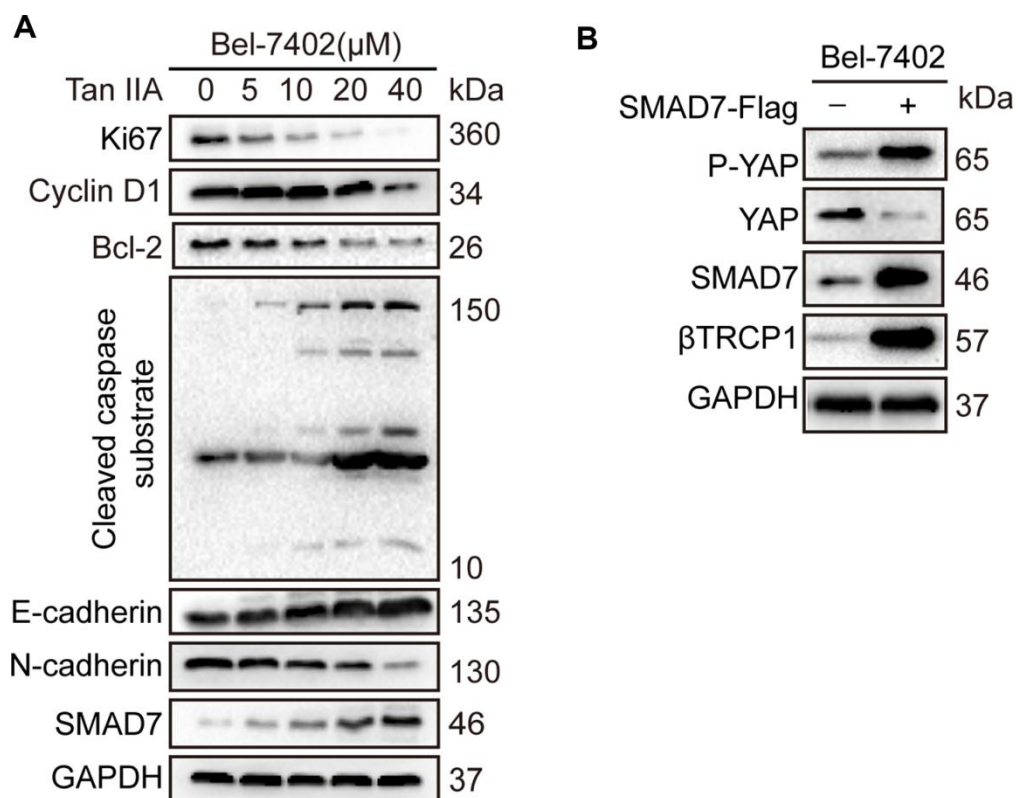

**Supplementary Figure 2.** (A) Bel-7402 cells were cultured with DMSO or dose dependent Tan IIA (5, 10, 20, 40  $\mu$ M) for 24 h and protein expression levels of Ki67, CyclinD1, Bcl2, Cleaved Caspase Substrate, E-cadherin and N-cadherin were measured by western blot assay. (B) P-YAP, YAP and  $\beta$ Trcp1 protein expression level were measured by western blot assay with or without SMAD7-Flag overexpression in Bel-7402 cells.
