# Supplementary material for: Tanshinone IIA mediates SMAD7-YAP interaction to inhibit liver cancer growth by inactivating the transforming growth factor beta signaling pathway
Source: publisher site journal article supplement (doi:10.18632/aging.102420), 2019-11-11
Supplement: Supplementary file [file aging-v11i21-102420-supplementary-material-SD2.pdf]

## SUPPLEMENTARY TABLES

**Supplementary Table 1. The biological significance gene lists.**

| Gene ID          | P value | P value summary |
|------------------|---------|-----------------|
| <b>BIRC2</b>     | 0.0113  | *               |
| <b>CCND1</b>     | 0.0444  | *               |
| <b>CDKN1B</b>    | 0.006   | **              |
| <b>CFLAR</b>     | 0.032   | *               |
| <b>DLC1</b>      | 0.0305  | *               |
| <b>GADD45B</b>   | 0.0338  | *               |
| <b>IGFBP3</b>    | 0.0031  | **              |
| <b>ITGB1</b>     | 0.0409  | *               |
| <b>KDR</b>       | 0.0081  | **              |
| <b>PTGS2</b>     | 0.0055  | **              |
| <b>SMAD6</b>     | 0.0121  | *               |
| <b>SMAD7</b>     | 0.0018  | **              |
| <b>TGFA</b>      | 0.0385  | *               |
| <b>TGFB1</b>     | 0.0057  | **              |
| <b>TGFBR2</b>    | 0.001   | **              |
| <b>TNFRSF10B</b> | 0.0058  | **              |

**Supplementary Table 2. Primers used for vectors.**

| Name                           | Sequence (5'-3')                             |
|--------------------------------|----------------------------------------------|
| SMAD7-Flag (PGIPZ2a)-F         | GAAAACCCTGGACCCATGGCTAGCATGGA                |
| SMAD7-Flag (PGIPZ2a)-R         | TTACAAGGATGACGATGACAAGTTCAGGACCAAACGATCT     |
| SMAD7-sgRNA (LentiCrispr v2)-F | GGGAGAGGGGCGGAATTTGCGGCCGCCTACCGGCTGTTGAAGAT |
| SMAD7-sgRNA (LentiCrispr v2)-R | CACCGGGGAGCGAGTAGGACGAGGG                    |
|                                | AAACCCCTCGTCTACTCGCTCCCC                     |

**Supplementary Table 3. Primers used for qPCR.**

| Gene    | Sequence (5'-3')         |
|---------|--------------------------|
| SMAD1-F | ACCTGCTTACCTGCCTCCTGAA   |
| SMAD1-R | AACGCTTCACCCACACGATTG    |
| SMAD2-F | ATGTCGTCCATCTTGCCATT     |
| SMAD2-R | TCCATTCTGCTCTCCTCCAC     |
| SMAD3-F | CCAGTGCTACCTCCAGTGTT     |
| SMAD3-R | CTGGTGGTCGCTAGTTTCTC     |
| SMAD4-F | GCTGCTGGAATTGGTGTGATG    |
| SMAD4-R | AGGTGTTTCTTTGATGCTCTGTCT |
| BIRC3-F | AAGCTACCTCTCAGCCTACTTT   |
| BIRC3-R | CCACTGTTTTCTGTACCCGGA    |
